## Subject Index

### Acetylcholinesterase

development in muscle cells isolated from ascidian embryos: MITA-MIYAZAWA, IKEGAMI & SATOH 1

### Adhesion

molecules: evidence for role of saccharides in cell interactions: RASTAN, THORPE, SCUDDER, BROWN, GOOI & FEIZI 115  
of mouse primordial germ cells to follicular and Sertoli cells: DE FELICI & SIRACUSA 87

### Agglutinin

allelic patterns of binding of *Dolichos* lectins in mice strains: PONDER, FESTING & WILKINSON 229

### Agouti

expression of mouse genes involved in pigment production: STEPHENSON & HORNBY 65

### Amino acids

in rat embryos undergoing organogenesis: ROWE & KALAIZIS 137

### Antigens

used to study cell interactions in preimplantation mouse embryos: RASTAN, THORPE, SCUDDER, BROWN, GOOI & FEIZI 115

### Apical ectodermal ridge

role in caudal fin morphogenesis in Zebra fish: DANE & TUCKER 145

### Ascidian

embryo  
acetylcholinesterase development in presumptive muscle cells: MITA-MIYAZAWA, IKEGAMI & SATOH 1

### Basal body

in oral development in *Stentor*: DE TERRA 249  
DE TERRA 241

### Basal lamina

development in pupoid foetus (*pf/pf*) mouse mutants: FISHER & KOLLAR 47

### Blood islands

formation *in vitro* from embryonic stem cells: DOETSCHMAN and others 27

### *Brachydanio rerio* (see Zebra fish)

### Carbohydrate antigens

used to study cell interactions in preimplantation mouse embryos: RASTAN, THORPE, SCUDDER, BROWN, GOOI & FEIZI 115

### Cell adhesion

in preimplantation embryos – role of saccharides: RASTAN, THORPE, SCUDDER, BROWN, GOOI & FEIZI 115

### Cell death

during development of *fused* – embryos of *Drosophila*: MARTINEZ-ARIAS 99

### Cell division

during oral development in ciliate *Stentor*: DE TERRA 249

### Cell interaction

between mouse primordial germ cells and follicular and Sertoli cells: DE FELICI & SIRACUSA 87  
in preimplantation embryos – role of saccharides in adhesion: RASTAN, THORPE, SCUDDER, BROWN, GOOI & FEIZI 115

### Chick

wing bud  
maps of strength of positional signalling activity: HONIG & SUMMERBELL 163

### Ciliate

basal body assembly and oral development in *Stentor*: DE TERRA 249  
inhibition of oral development in *Stentor*: DE TERRA 241

### *Ciona intestinalis*

acetylcholinesterase development in muscle cells isolated from embryos: MITA-MIYAZAWA, IKEGAMI & SATOH 1

### Cleavage

regulation in first cell cycle in mouse embryo: HOWLETT & BOLTON 175

### Cranial development

in rat embryo – SEM and kinetic study: TUCKETT, LIM & MORRISS-KAY 215

### Cytoskeleton

oral development in *Stentor*: DE TERRA 241  
DE TERRA 249

### Deoxyribose nucleic acid (DNA)

quantal replication cycle for tissue specific enzyme development: MITA-MIYAZAWA, IKEGAMI & SATOH 1  
synthesis and regulation in first cell cycle in mouse embryo: HOWLETT & BOLTON 175

### Dermal–epidermal junction

in pupoid foetus mutant mice: FISHER & KOLLAR 47

***Dictyostelium discoideum***

pH affects fruiting and slug orientation:  
BONNER, HAY, JOHN & SUTHERS 207

**Differential gene expression**

in mouse embryos – genes involved in pigment production: STEPHENSON & HORNBY 65

***Dolichos biflorus* lectin**

allelic patterns of binding in inbred strains of mice: PONDER, FESTING & WILKINSON 229

**Dominant spotting (*W*) locus**

expression of mouse genes involved in pigment production: STEPHENSON & HORNBY 65

***Drosophila melanogaster***

development of *fused*<sup>-</sup> embryos: MARTINEZ-ARIAS 99

origin of pattern duplications in segment polarity mutants: MARTINEZ-ARIAS & INGHAM 129

**Duplication**

after grafting of tissue in chick wing bud: HONIG & SUMMERBELL 163

**Embryonic stem cells (ES)**

*in vitro* development of visceral yolk sac etc: DOETSCHMAN and others 27

**Endo- $\beta$ -galactosidase**

used to study cell interactions in preimplantation mouse embryos: RASTAN, THORPE, SCUDDER, BROWN, GOOI & FEIZI 115

**Epidermal/dermal recombinants**

used to study differential expression of mouse pigment genes: STEPHENSON & HORNBY 65

**Extracellular matrix**

modulation during caudal fin morphogenesis in Zebra fish: DANE & TUCKER 145

**Fertilization**

sequence and regulation of first cell cycle in mouse embryo: HOWLETT & BOLTON 175

**Fin fold**

morphogenesis in Zebra fish: DANE & TUCKER 145

**Follicular monolayers**

adhesiveness of mouse primordial germ cells: DE FELICI & SIRACUSA 87

**Fruiting**

in *Dictyostelium* is affected by pH: BONNER, HAY, JOHN & SUTHERS 207

***fused*<sup>-</sup>**

development of *Drosophila* embryos: MARTINEZ-ARIAS 99

**Genetic polymorphism**

in binding of *Dolichos* lectin in mice: PONDER, FESTING & WILKINSON 229

**Glycosyltransferases**

allelic patterns of binding of *Dolichos* lectins in mice strains: PONDER, FESTING & WILKINSON 229

**Gradient**

of pH affects fruiting and slug orientation in *Dictyostelium*: BONNER, HAY, JOHN & SUTHERS 207

***Homarus americanus***

polyneuronal innervation of adult and embryonic muscle: GOVIND, STEPHENS & EISEN 13

**Homoeotic genes**

of *Drosophila*: segment polarity mutants: MARTINEZ-ARIAS & INGHAM 129

**Inbred mice**

allelic patterns of binding of *Dolichos* lectin in tissues: PONDER, FESTING & WILKINSON 229

**Innervation**

polyneuronal in adult and embryonic lobster muscles: GOVIND, STEPHENS & EISEN 13

**Intermediate filaments**

during caudal fin morphogenesis in Zebra fish: DANE & TUCKER 145

***In vitro***

culture of rat embryos – serine metabolism: ROWE & KALAZIS 137

development of mouse blastocyst-derived embryonic stem cell lines: DOETSCHMAN and others 27

**Lectin**

allelic patterns of binding of *Dolichos* lectins in mice strains: PONDER, FESTING & WILKINSON 229

**Lobster**

polyneuronal innervation of adult and embryonic muscle: GOVIND, STEPHENS & EISEN 13

**Mitosis**

during ontogenesis of rat embryonic cranial neuromeres: TUCKETT, LIM & MORRISS-KAY 75

**Monoclonal antibodies**

used to study dynamics of tubulin structures *Xenopus* oogenesis: PALEČEK, HABROVÁ, HEVDÍDEK & ROMANOVSKÝ 75

**Motoneurons**

polyneuronal innervation of adult and embryonic lobster muscle: GOVIND, STEPHENS & EISEN 13

**Mouse**

embryo

abnormal development in pupoid foetus (*pf/pf*) mutants: FISHER & KOLLAR 47

cell interactions—role of saccharides in cell adhesion: RASTAN, THORPE, SCUDDER, BROWN, GOOI & FEIZI 115

expression of genes involved in pigment production: STEPHENSON & HORNBY 65

*in vitro* development of blastocyst-derived embryonic stem cell lines: DOETSCHMAN and others 27

sequence and regulation of the first cell cycle: HOWLETT & BOLTON 175

inbred strains

allelic patterns of binding of *Dolichos* lectin in tissues: PONDER, FESTING & WILKINSON 229

primordial germ cells

adhesiveness to follicular and Sertoli cell monolayers: DE FELICI & SIRACUSA 87

**Muscle**

lineage cells

isolated from ascidian embryos: MITA-MIYAZAWA, IKEGAMI & SATOH 1

polyneuronal innervation in adult and embryonic lobsters: GOVIND, STEPHENS & EISEN 13

**Mutant**

pupoid foetus (*pf/pf*)

abnormal skin development in mice: FISHER & KOLLAR 47

segment polarity of *Drosophila melanogaster*: MARTINEZ-ARIAS & INGHAM 129

*fused*—

in *Drosophila melanogaster*: MARTINEZ-ARIAS 99

**Myocardium**

formation *in vitro* from embryonic stem cells: DOETSCHMAN and others 27

**Neural tube**

ontogenesis in rat embryos: TUCKETT, LIM & MORRIS-KAY 215

**Neuromeres**

scanning electron microscope and kinetic study: TUCKETT, LIM & MORRIS-KAY 217

**Neuromuscular synapses**

polyneuronal innervation of adult and em-

bryonic lobster muscle: GOVIND, STEPHENS & EISEN 13

**One-carbon metabolism**

in rat embryos undergoing organogenesis: ROWE & KALAIZIS 137

**Oogenesis**

in *Xenopus laevis* — dynamics of tubulin structures: PALEČEK, HABROVÁ, NEDVÍDEK & ROMANOVSKÝ 75

**Oral development**

in ciliate *Stentor*: DE TERRA 241  
DE TERRA 249

**Pattern duplications**

in *fused*— embryos of *Drosophila melanogaster*: MARTINEZ-ARIAS 99

in segment polarity mutants of *Drosophila melanogaster*: MARTINEZ-ARIAS & INGHAM 129

***pf/pf* (pupoid foetus) mutant**

abnormal skin development in mice: FISHER & KOLLAR 47

**pH**

affect on fruiting and slug orientation in *Dictyostelium*: BONNER, HAY, JOHN & SUTHERS 209

**Pink-eyed dilution**

expression of mouse genes involved in pigment production: STEPHENSON & HORNBY 65

**Polarity**

reversed in segment polarity mutants of *Drosophila melanogaster*: MARTINEZ-ARIAS & INGHAM 129

**Poly-N-acetyllactosamines**

evidence for involvement in cell interactions in mouse embryos: RASTAN, THORPE, SCUDDER, BROWN, GOOI & FEIZI 115

**Polyneuronal innervation**

of adult and embryonic lobster muscle: GOVIND, STEPHENS & EISEN 13

**Polypeptide synthesis**

sequence and regulation in first cell cycle in mouse embryo: HOWLETT & BOLTON 175

**Positional signalling**

maps of strength in chick wing bud: HONIG & SUMMERBELL 163

**Primordial germ cells**

adhesiveness to mouse follicular and Sertoli cell monolayers: DE FELICI & SIRACUSA 87

**Pronuclei**

sequence and regulation of first cell cycle in mouse embryo: HOWLETT & BOLTON 175

**Rat**

## embryo

ontogenesis of cranial neuromeres – SEM and kinetics: TUCKETT, LIM & MORRISKAY 215

serine metabolism during morphogenesis: ROWE & KALAZIS 137

**Sash (W<sup>sh</sup>)**

expression of mouse genes involved in pigment production: STEPHENSON & HORNBY 65

**Segment polarity mutants**

of *Drosophila melanogaster*: MARTINEZ-ARIAS & INGHAM 129

**Serine metabolism**

in rat embryos undergoing organogenesis: ROWE & KALAZIS 137

**Sertoli cells**

adhesiveness of mouse primordial germ cells to monolayers: DE FELICI & SIRACUSA 87

**Skin**

development in pupoid foetus (*pf/pf*) mouse mutants: FISHER & KOLLAR 47

**Slug orientation**

in *Dictyostelium* is affected by pH: BONNER, HAY, JOHN & SUTHERS 207

**Stentor**

basal body assembly and oral development in *Stentor*: DE TERRA 249

inhibition of oral development: DE TERRA 241

**Tissue morphogenesis**

during caudal fin development in Zebra fish: DANE & TUCKER 145

**Tissue-specific**

enzyme development in muscle cells isolated from ascidian embryos: MITA-MIYAZAWA, IKEGAMI & SATOH 1

**Tubulin**

dynamics of structures in *Xenopus laevis* oogenesis: PALEČEK, HABROVÁ, NEDVÍDEK & ROMANOVSKÝ 75

**Visceral yolk sac**

formation *in vitro* from embryonic stem cells: DOETSCHMAN and others 27

**Vitellogenesis**

in *Xenopus laevis* – dynamics of tubulin structures: PALEČEK, HABROVÁ, NEDVÍDEK & ROMANOVSKÝ 75

**Wing bud**

## chick

maps of strength of positional signalling activity: HONIG & SUMMERBELL 163

***Xenopus laevis***

## oogenesis

dynamics of tubulin structures: PALEČEK, HABROVÁ, NEDVÍDEK & ROMANOVSKÝ 75

**Zebra fish**

*Brachydanio rerio* – caudal fin morphogenesis: DANE & TUCKER 145

**Zone of polarizing activity**

in developing chick wing bud: HONIG & SUMMERBELL 163
